# Supplementary material
Source: Springer Nature journal article supplement (https://www.springermedizin.de/resource/supplementary/12889_2009_2169_MOESM9_ESM.pdf/9484826)

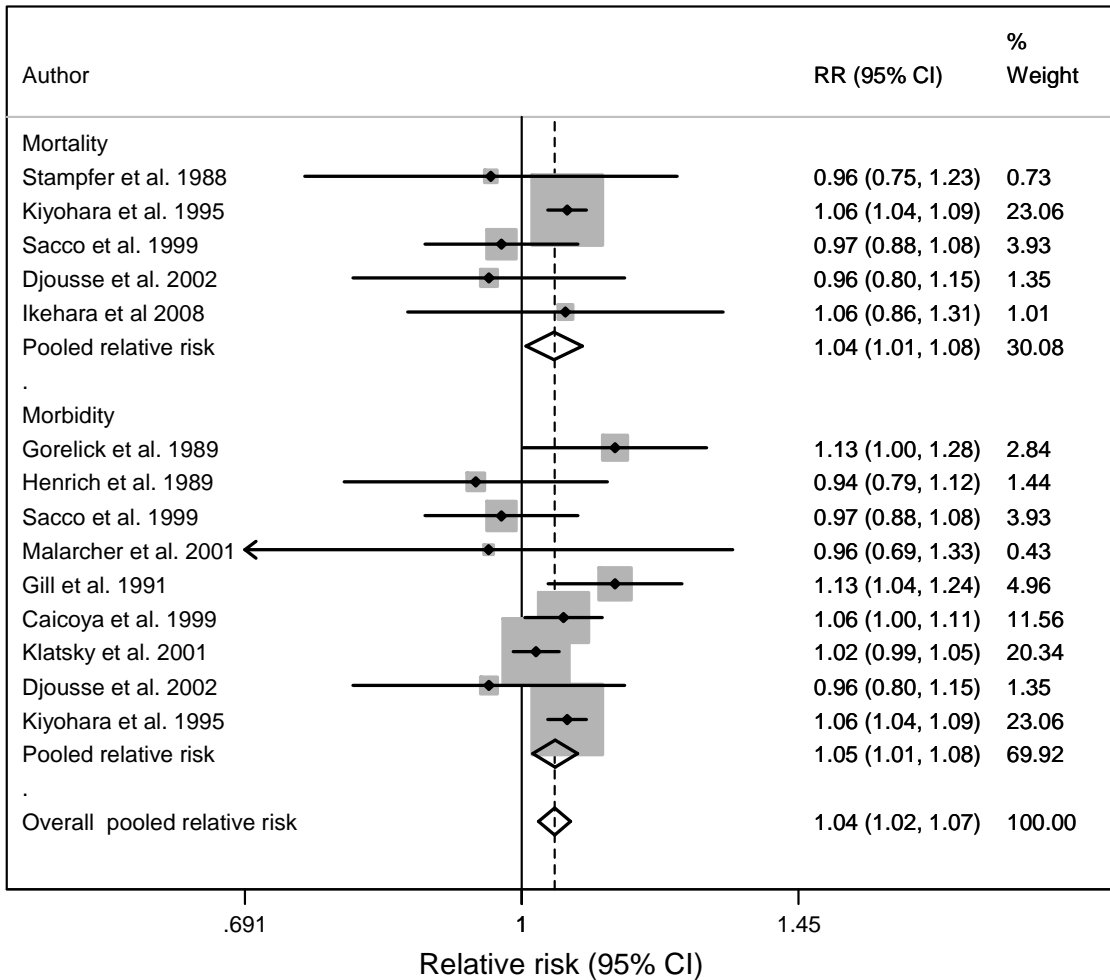

Supplement: MOESM9 [file 9484826]
